# Supplementary material
Source: HighWire-hosted journal article supplement (https://www.annfammed.org/highwire/filestream/9014/field_highwire_adjunct_files/0/Schoenborn_Supp_Appendix.pdf)
Supplement: Schoenborn_Supp_Appendix.pdf [file Schoenborn_Supp_Appendix.pdf]

Supplemental materials for:

Schoenborn NL, Janssen EM, Boyd C, et al. Older adults' preferences for discussing long-term life expectancy: results from a national survey. *Ann Fam Med.* 2018;16(6):530-537.

## Supplemental Appendix

### Hypothetical scenario described in the survey

Mr. Jackson has multiple serious health conditions. He takes several medications and has been in the hospital twice in the last year. Because of his health, he can no longer shop by himself or drive. He walks with a cane. He still enjoys watching TV, playing bingo, and spending time with his family. Mr. Jackson's doctor thinks that Mr. Jackson may not live as long as other people of his age.

The doctor asks Mr. Jackson whether he would like to talk about how long he may live. If you were Mr. Jackson, how would you answer?
